# Supplementary material
Source: publisher site journal article supplement (https://www.dovepress.com/article/339257)
Supplement: Supplementary file 1 [file get_supplementary_file.php]

**Supporting information**

**Theranostic Nanoplatform with Sequential SDT and ADV Effects in Response to Well-Programmed LIFU Irradiation for Cervical Cancer**

| NP | Size [nm] | Zeta potential  [mV] | Carrier rate of IR780 [%] | Carrier rate of Gd-DTPA [%] |
| --- | --- | --- | --- | --- |
| IG@P | 170.2 ± 2.90 | -4.8 ± 2.20 | 62.99 ± 3.01 | 52.79 ± 0.79 |
| GP@P | 169.9 ± 5.41 | -13.1 ± 0.90 | / | 49.89 ± 1.56 |
| IGP@P | 174.5 ± 3.10 | -5.5 ± 3.31 | 67.39 ± 4.07 | 57.60 ± 5.42 |

**Table S1** Characteristics of the different NPs


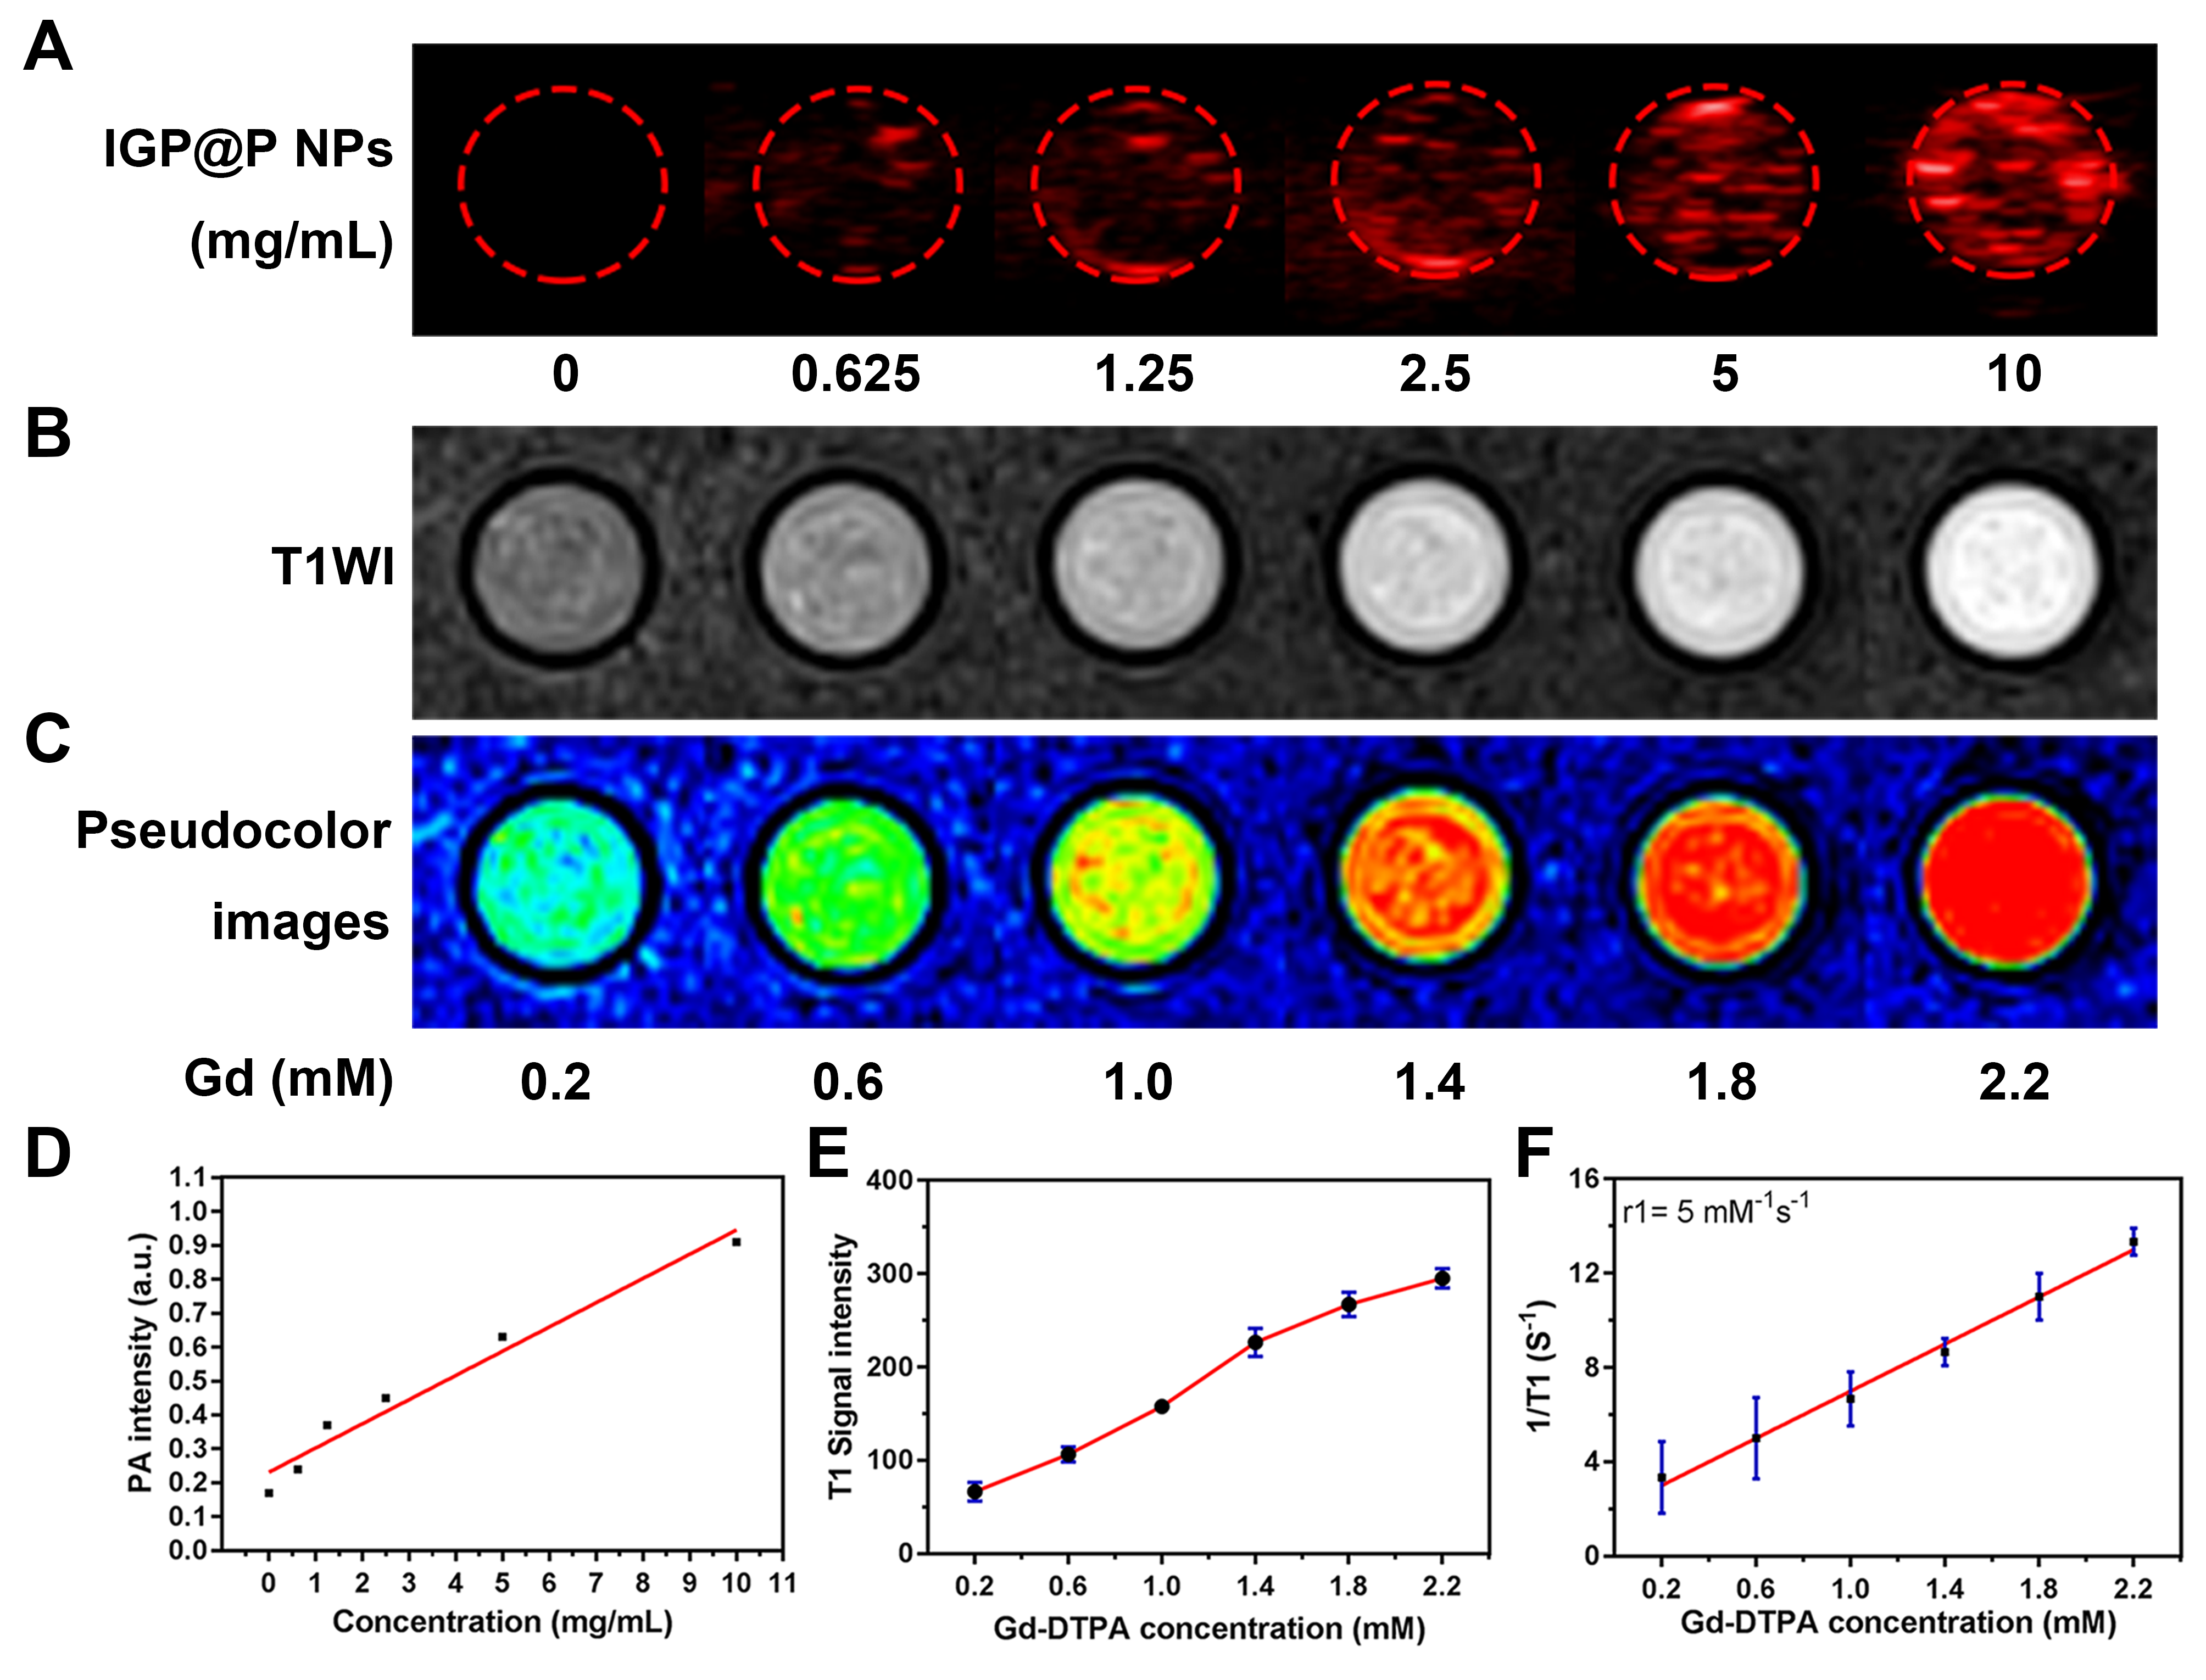


**Figure S1** *In vitro* PA and MR imaging.

PA imaging (A) and the corresponding PA intensity (a.u.) of the IGP@P NPs at various concentrations (0, 0.625, 1.25, 2.5, 5, 10 mg/mL) (D). MR T1WI (B) and pseudocolor images (C) of the IGP@P NPs at different Gd-DTPA concentrations (0.2, 0.6, 1.0, 1.4, 1.8, 2.2 mM). MR T1 signal intensity (E) and 1/T1 values (F) of the IGP@P NPs with different Gd-DTPA concentrations (0.2, 0.6, 1.0, 1.4, 1.8, 2.2 mM).


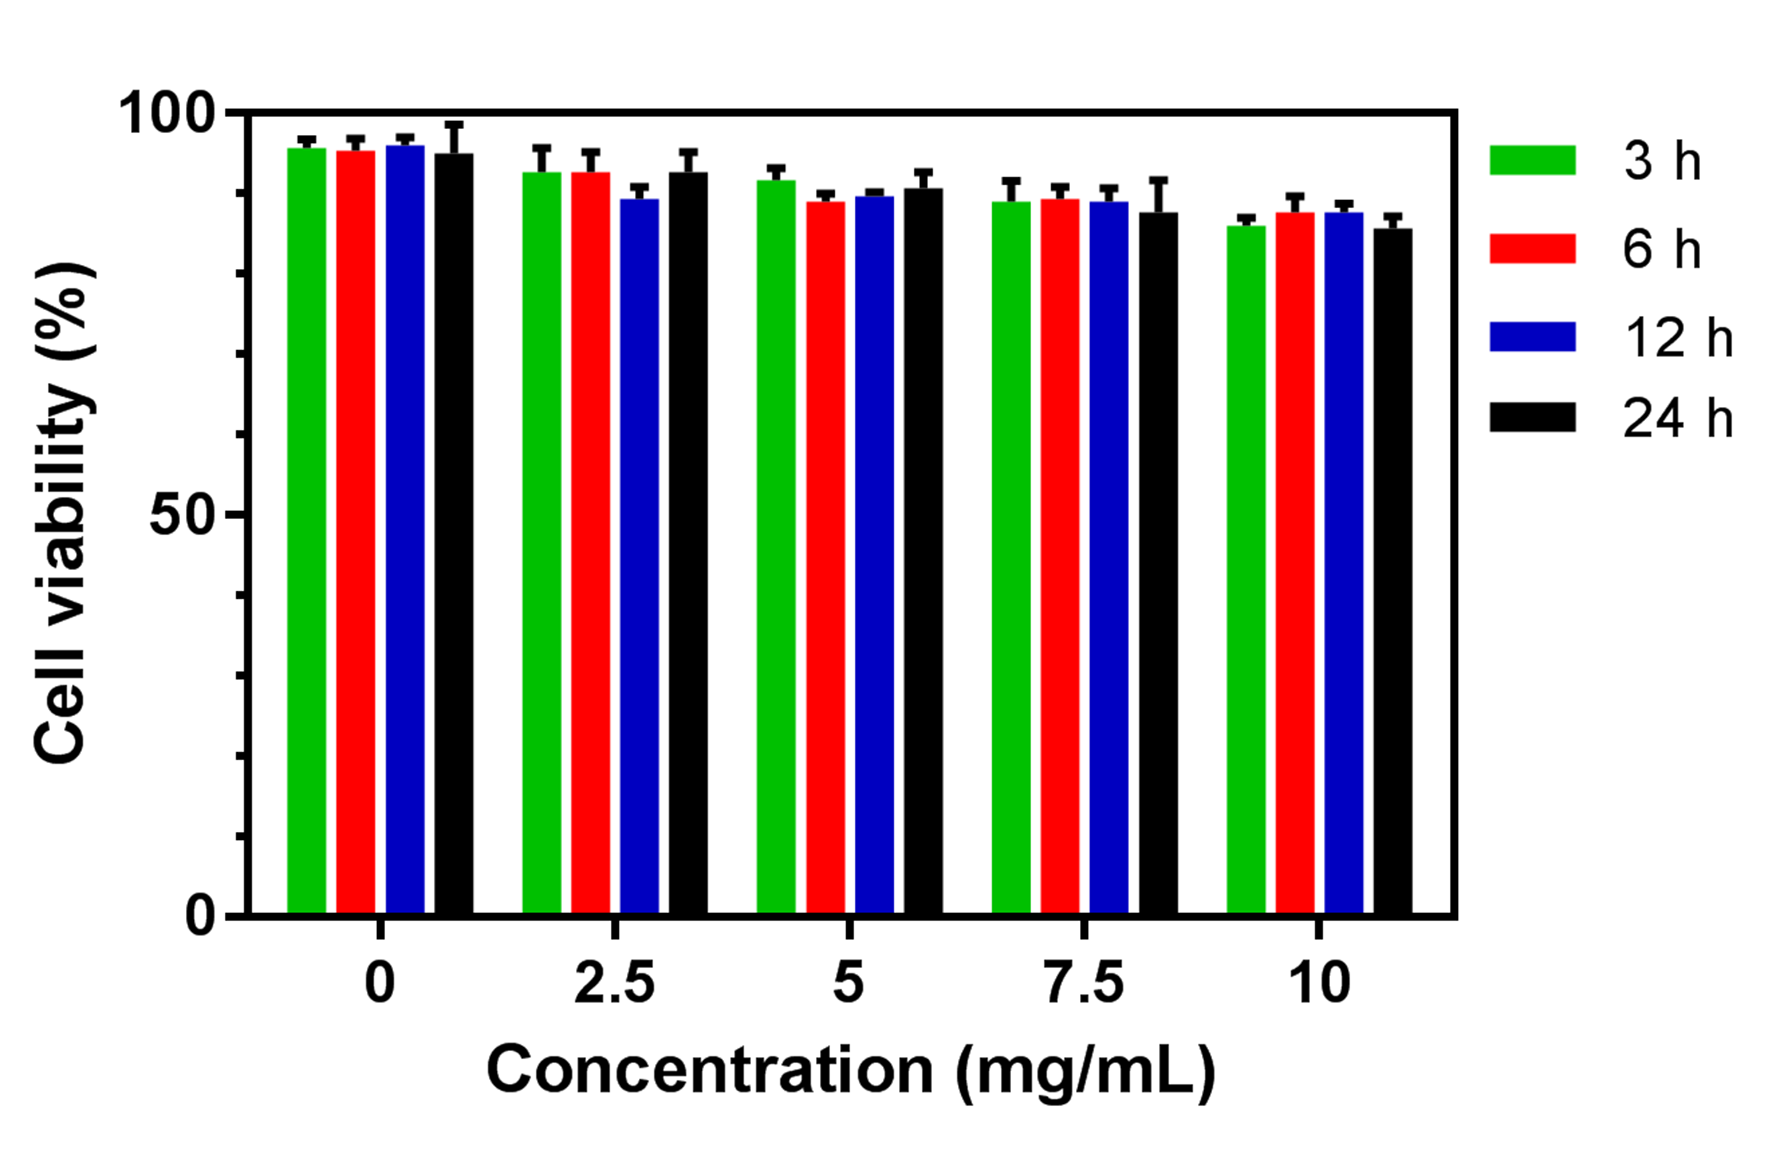


**Figure S2** *In vitro* cytotoxicity assay.

Relative viability of HeLa cells after incubation with various concentrations (0, 2.5, 5, 7.5 and 10 mg/mL) of IGP@P NPs for 3, 6, 12, and 24 h.

| LIFU Irradiation time (min) | Group | ROS generation | Phase transition | Apoptosis/necrosis rate |
| --- | --- | --- | --- | --- |
| 2 | Control | **-** | - | - |
| IG@P + LIFU | **++** | - | **+** |
| GP@P + LIFU | **-** | **-** | **+** |
| IGP@P + LIFU | **++** | **-** | **+** |
| IGP@P LIFU(-) | **-** | **-** | **-** |
|  |  |  |  |  |
| 4 | Control | **-** | **-** | **-** |
| IG@P + LIFU | **++** | **-** | **++** |
| GP@P + LIFU | **-** | **+** | **++** |
| IGP@P + LIFU | **++** | **+** | **++** |
| IGP@P LIFU(-) | **-** | **-** | **-** |
|  |  |  |  |  |
| 6 | Control | **-** | **-** | **-** |
| IG@P + LIFU | **-** | **-** | **++** |
| GP@P + LIFU | **-** | **++** | **+++** |
| IGP@P + LIFU | **-** | **++** | **++++** |
| IGP@P LIFU(-) | **-** | **-** | **-** |

**Table S2** Evaluation of the cell therapy effects (ROS generation, phase transition inside the cells, and apoptosis/necrosis rate of cells)


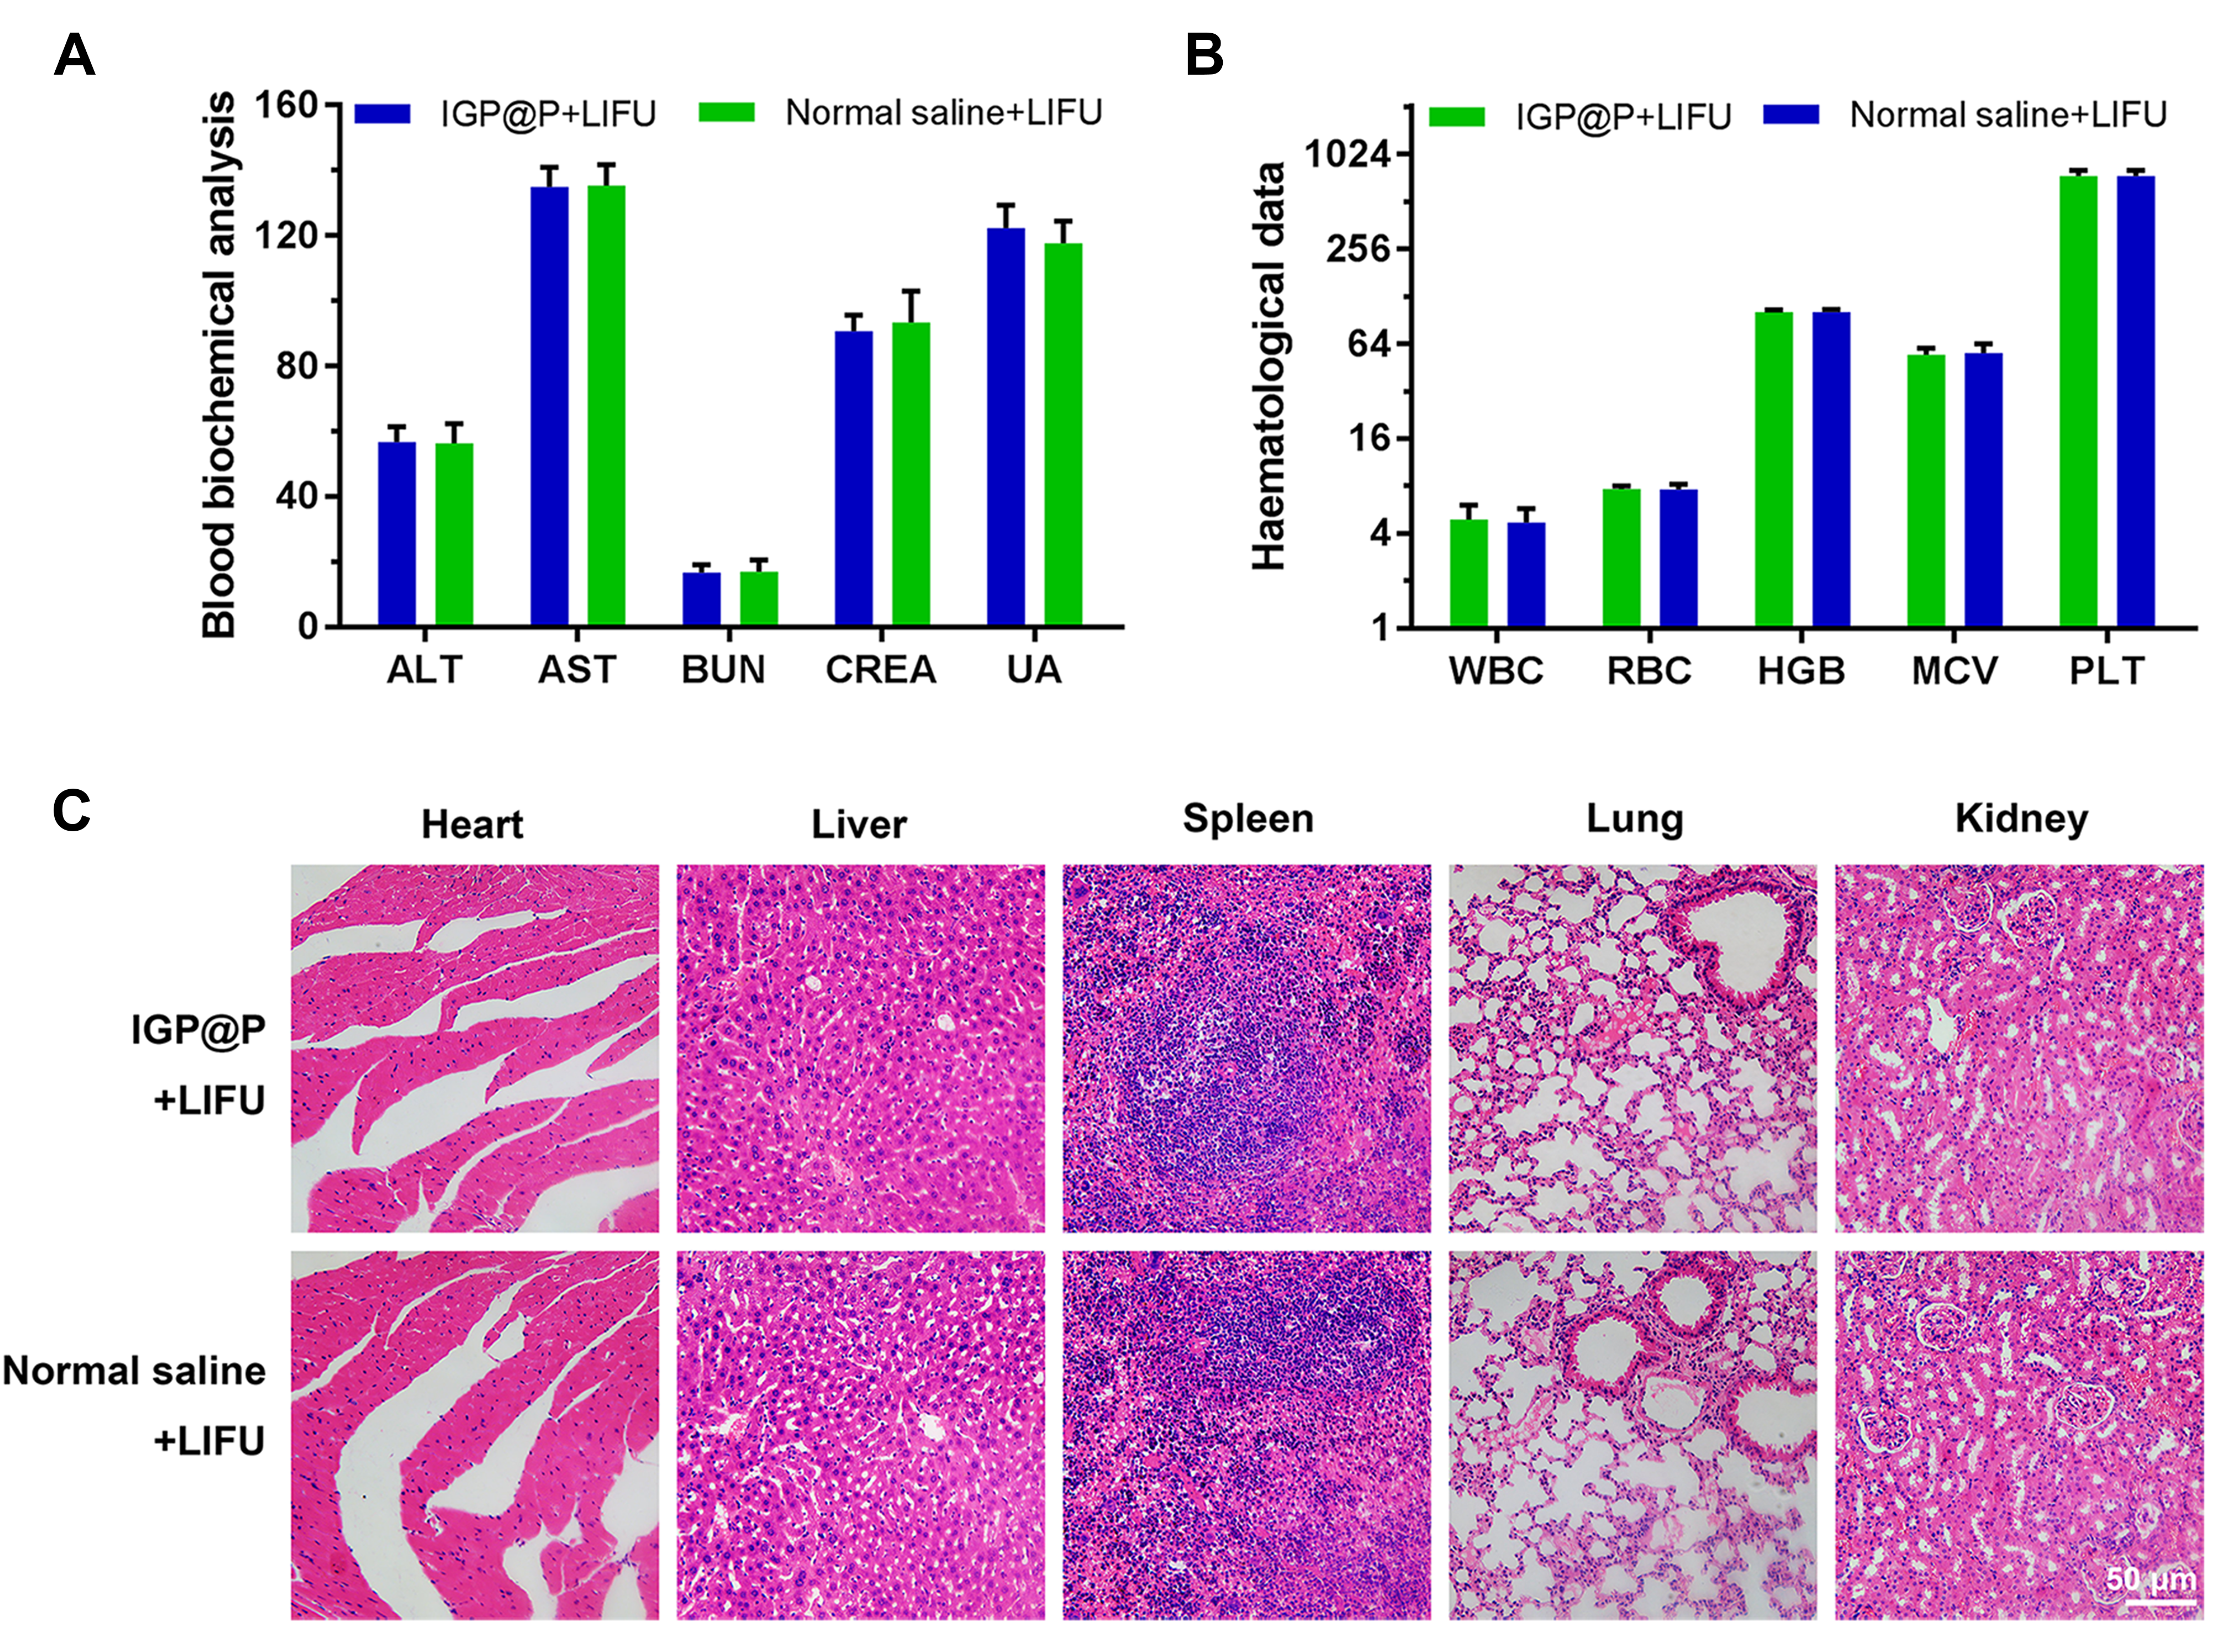


**Figure S3** *In vivo* systemic toxicity. Blood biochemical analysis of the mice in the IGP@P+ LIFU and normal saline + LIFU groups after treatment, including the ALT, AST, CREA, BUN and UA levels (A). Hematological data of the mice in the IGP@P + LIFU and normal saline + LIFU groups after treatment, including the WBC, RBC, HGB, MCV and PLT levels (B). H&E staining of the major organs (heart, liver, spleen, lung, and kidney) (C).
